# Supplementary material
Source: MDPI journal article supplement (https://www.mdpi.com/2304-6740/11/12/463)
Supplement: s1 [file s1]

## Supplementary Materials

**Table S1.** Crystal data and structure refinement for complex **1**

**Table S2.** Crystal data and structure refinement for complex **2**

**Table S3.** CO vibrational stretching frequencies for complexes **1**, **2** and analogous di-iron complexes in CH<sub>2</sub>Cl<sub>2</sub>

**Table S4.** Selected angles (°) of the ligand pma in **1,2**.

**Figure S1.** IR (CH<sub>2</sub>Cl<sub>2</sub>) spectra of **1** (a) and **2** (b) in carbonyl region

**Figure S2.** <sup>1</sup>H NMR (a) and <sup>13</sup>C{<sup>1</sup>H} (b) NMR spectra of **1** in CD<sub>2</sub>Cl<sub>2</sub> at 298 K

**Figure S3.** <sup>1</sup>H NMR (a) and <sup>13</sup>C{<sup>1</sup>H} (b) NMR spectra of **2** in CD<sub>2</sub>Cl<sub>2</sub> at 298 K

**Figure S4.** Experimental UV-Visible spectrum of **1** in CH<sub>2</sub>Cl<sub>2</sub> (a); theoretical UV-Visible spectrum of **1** (b)

**Figure S5.** Scan rate dependence of the reduction peak of **1** in CH<sub>2</sub>Cl<sub>2</sub>-[NBu<sub>4</sub>][PF<sub>6</sub>] (0.2 M) under Ar

**Figure S6.** Scan rate dependence of the reduction peak of **2** in CH<sub>2</sub>Cl<sub>2</sub>-[NBu<sub>4</sub>][PF<sub>6</sub>] (0.2 M) under Ar

**Figure S7.** Oxidation of **1** (1.26 mM) (a) and **2** (1.44 mM) (b) in the presence of CH<sub>3</sub>CO<sub>2</sub>H in CH<sub>2</sub>Cl<sub>2</sub>-[NBu<sub>4</sub>][PF<sub>6</sub>] (0.2 M) under Ar at 0.2 Vs<sup>-1</sup>.

**Figure S8.** CV, reduction (a) and oxidation (b), of **1** (1.39 mM) and **2** (1.46 mM) in the presence of CF<sub>3</sub>CO<sub>2</sub>H in CH<sub>2</sub>Cl<sub>2</sub>-[NBu<sub>4</sub>][PF<sub>6</sub>] (0.2 M) under Ar at 0.2 Vs<sup>-1</sup>.

**Figure S9.** (a) Optimized structure of **1a<sup>-</sup>** with details on selected geometrical parameters and their comparison with **1**. (b) Spin density plot of **1a<sup>-</sup>** with related single contribution values to the total spin density for selected atoms. (c) Calculated IR νCO bands of **1a<sup>-</sup>**.

**Figure S10.** (a) HOMO of **1a<sup>2-</sup>** (isosurface cutoff 0.05 a.u.), showing a mixed metal-ligand character. (b) Calculated IR νCO bands of **1a<sup>2-</sup>**.

**Figure S11.** (a) Thermodynamic speciation of **2<sup>-</sup>**. (The anionic nature of all structure reported is implicit, thus omitted for clarity). (b) Theoretical IR spectrum in the νCO region (in CH<sub>2</sub>Cl<sub>2</sub>) of **2a<sup>-</sup>**. (c) Spin density plot in **2a<sup>-</sup>**.

**Figure S12.** (a) Thermodynamic speciation of **2<sup>2-</sup>**. (The anionic nature of all structure reported is implicit, thus omitted for clarity). (b) Theoretical IR spectrum in the νCO region (in CH<sub>2</sub>Cl<sub>2</sub>) of **2a<sup>2-</sup>**.

**Figure S13.** (a) Thermodynamic speciation of **2<sup>3-</sup>**. (The anionic nature of all structure reported is implicit, thus omitted for clarity). (b) Theoretical IR spectrum in the νCO region (in CH<sub>2</sub>Cl<sub>2</sub>) of **2a<sup>3-</sup>**. (c) Spin density plot of **2<sup>3-</sup>**.

**Figure S14.** Thermodynamic speciation of **1H<sup>-</sup>**. (The anionic nature of all structure reported is implicit, thus omitted for clarity).

**Figure S15.** Spin density plot of **1H<sup>2-</sup>** (a) and **1H<sup>2-</sup>** (b).

**Figure S16.** Thermodynamic speciation of **1H<sup>2-</sup>**. (The anionic nature of all structure reported is implicit, thus omitted for clarity).

**Table S1.** Crystal data and structure refinement for complex 1

|                                               |                                                                                                                       |
|-----------------------------------------------|-----------------------------------------------------------------------------------------------------------------------|
| Empirical formula                             | C <sub>22</sub> H <sub>14</sub> Fe <sub>2</sub> N <sub>2</sub> O <sub>4</sub> S <sub>2</sub>                          |
| Formula weight                                | 546.17                                                                                                                |
| Temperature                                   | 170 (2) K                                                                                                             |
| Wavelength                                    | 0.71073 Å                                                                                                             |
| Crystal system, space group                   | Triclinic, P-1                                                                                                        |
| Unit cell dimensions                          | a = 7.7943(7) Å    α = 94.678(13) °<br>b = 8.1935(12) Å    β = 108.426(12) °<br>c = 9.2975(16) Å    γ = 102.486(10) ° |
| Volume                                        | 542.75 (13) Å <sup>3</sup>                                                                                            |
| Z, Calculated density                         | 1, 1.671 Mg/m <sup>3</sup>                                                                                            |
| Absorption coefficient                        | 1.561 mm <sup>-1</sup>                                                                                                |
| F(000)                                        | 276                                                                                                                   |
| Crystal description                           | plate                                                                                                                 |
| Crystal color                                 | Light brown                                                                                                           |
| Crystal size                                  | 0.13 x 0.10 x 0.02 mm                                                                                                 |
| Theta range for data collection               | 3.73 to 26.37 °                                                                                                       |
| Limiting indices                              | -9 ≤ h ≤ 9, -10 ≤ k ≤ 9, -7 ≤ l ≤ 11                                                                                  |
| Reflections collected / unique                | 3485 / 2768 [ <i>R</i> <sub>int</sub> = 0.0627]                                                                       |
| Completeness to theta = 26.37                 | 99.4 %                                                                                                                |
| Absorption correction                         | Analytical                                                                                                            |
| Max. and min. transmission                    | 0.9694 and 0.8228                                                                                                     |
| Refinement method                             | Full-matrix least-squares on F <sup>2</sup>                                                                           |
| Data / restraints / parameters                | 2768 / 3 / 289                                                                                                        |
| Goodness-of-fit on F <sup>2</sup>             | 1.078                                                                                                                 |
| Final R indices [ <i>I</i> > 2σ ( <i>I</i> )] | <i>R</i> <sub>1</sub> = 0.0776, <i>wR</i> <sub>2</sub> = 0.1886                                                       |
| R indices (all data)                          | <i>R</i> <sub>1</sub> = 0.0959, <i>wR</i> <sub>2</sub> = 0.2162                                                       |
| Absolute structure parameter                  | 0.10(5)                                                                                                               |
| Largest diff. peak and hole                   | 1.103 and -1.085 e.Å <sup>-3</sup>                                                                                    |

**Table S2.** Crystal data and structure refinement for complex 2

|                             |                                                                                              |
|-----------------------------|----------------------------------------------------------------------------------------------|
| Empirical formula           | C <sub>19</sub> H <sub>16</sub> Fe <sub>2</sub> N <sub>2</sub> O <sub>4</sub> S <sub>2</sub> |
| Formula weight              | 512.16                                                                                       |
| Temperature                 | 170(2) K                                                                                     |
| Wavelength                  | 0.71073 Å                                                                                    |
| Crystal system, space group | Monoclinic, P 1 21/c 1                                                                       |
| Unit cell dimension         | a = 8.4654(3) Å<br>b = 10.8531(4) Å    β = 100.080(3) °<br>c = 22.1417(9) Å                  |
| Volume                      | 2002.89(13) Å <sup>3</sup>                                                                   |
| Z, Calculated density       | 4, 1.698 Mg/m <sup>3</sup>                                                                   |
| Absorption coefficient      | 1.686 mm <sup>-1</sup>                                                                       |
| F(000)                      | 1040                                                                                         |

|                                      |                                            |
|--------------------------------------|--------------------------------------------|
| Crystal size                         | 0.22 x 0.06 x 0.05 mm                      |
| Crystal color                        | Dark green                                 |
| Crystal shape                        | Prism, axis [1 0 0]                        |
| Theta range for data collection      | 3.74 to 26.37 °                            |
| Limiting indices                     | -10 ≤ h ≤ 9, -13 ≤ k ≤ 12, -27 ≤ l ≤ 21    |
| Reflections collected/unique         | 12568 / 4085 [ $R_{\text{int}} = 0.0777$ ] |
| Completeness to $\theta = 26.37$     | 99.7 %                                     |
| Absorption correction                | Analytical                                 |
| Max and min. transmission            | 0.9204 and 0.7080                          |
| Refinement method                    | Full-matrix least-squares on $F^2$         |
| Data/restraints/parameters           | 4085/ 0 / 262                              |
| Goodness-of-fit on $F^2$             | 1.065                                      |
| Final R indices [ $I > 2\sigma(I)$ ] | $R_1 = 0.0375$ , $wR_2 = 0.0815$           |
| R indices (all data)                 | $R_1 = 0.0497$ , $wR_2 = 0.0886$           |
| Largest diff. peak and hole          | 0.439 and -0.417 e.Å <sup>-3</sup>         |

**Table S3.** CO vibrational stretching frequencies for complexes **1**, **2** and analogous di-iron complexes in CH<sub>2</sub>Cl<sub>2</sub>

| Compound                                                                                     | $\nu_{\text{CO}} / \text{cm}^{-1}$ | Average $\nu_{\text{CO}} / \text{cm}^{-1}$ |
|----------------------------------------------------------------------------------------------|------------------------------------|--------------------------------------------|
| [Fe <sub>2</sub> (CO) <sub>6</sub> ( $\mu$ -pdt)]                                            | 2073, 2033, 1999 [9]               | 2035                                       |
| [Fe <sub>2</sub> (CO) <sub>6</sub> ( $\mu$ -bdt)]                                            | 2078, 2043, 2004 [47]              | 2042                                       |
| [Fe <sub>2</sub> (CO) <sub>4</sub> ( $\kappa^2$ -bipy)( $\mu$ -pdt)]                         | 2007, 1937, 1896 [16]              | 1947                                       |
| [Fe <sub>2</sub> (CO) <sub>4</sub> ( $\kappa^2$ -bipy)( $\mu$ -bdt)]                         | 2016, 1949, 1916 [15]              | 1960                                       |
| [Fe <sub>2</sub> (CO) <sub>4</sub> ( $\kappa^2$ -bpym)( $\mu$ -pdt)]                         | 2012, 1943, 1907 [15]              | 1954                                       |
| [Fe <sub>2</sub> (CO) <sub>4</sub> ( $\kappa^2$ -bpym)( $\mu$ -bdt)]                         | 2022, 1958, 1927 [15]              | 1968                                       |
| [Fe <sub>2</sub> (CO) <sub>4</sub> ( $\kappa^2$ -phen)( $\mu$ -pdt)]                         | 2008, 1939, 1897 [20]              | 1948                                       |
| [Fe <sub>2</sub> (CO) <sub>4</sub> ( $\kappa^2$ -phen)( $\mu$ -adt <sup><i>t</i>-Pr</sup> )] | 2008, 1938, 1895 [21]              | 1947                                       |
| [Fe <sub>2</sub> (CO) <sub>4</sub> ( $\kappa^2$ -pap)( $\mu$ -bdt)]                          | 2026, 1974, 1964, 1947* [22]       | 1978*                                      |
| [Fe <sub>2</sub> (CO) <sub>4</sub> ( $\kappa^2$ -pma)( $\mu$ -pdt)]                          | 2014, 1946, 1904                   | 1955                                       |
| [Fe <sub>2</sub> (CO) <sub>4</sub> ( $\kappa^2$ -pma)( $\mu$ -bdt)]                          | 2022, 1954, 1924                   | 1967                                       |

\* hexane

**Table S4.** Selected angles (°) of the ligand pma in **1,2**.

|               | <b>1</b>   | <b>2</b>    |
|---------------|------------|-------------|
| Fe(1)-N'-C(b) | 127.2 (9)  | 128.02 (17) |
| Fe(1)-N'-C(a) | 116.3 (10) | 115.24 (18) |
| C(b)-N'-C(a)  | 116.3 (12) | 116.7 (2)   |
| N'-C(a)-C(c)  | 114.0(14)  | 116.7 (2)   |
| Fe(1)-N-C(c)  | 112.6 (9)  | 114.53 (17) |
| Fe(1)-N-C(d)  | 128.0 (11) | 128.74 (19) |
| C(c)-N-C(d)   | 119.4 (12) | 116.7 (2)   |

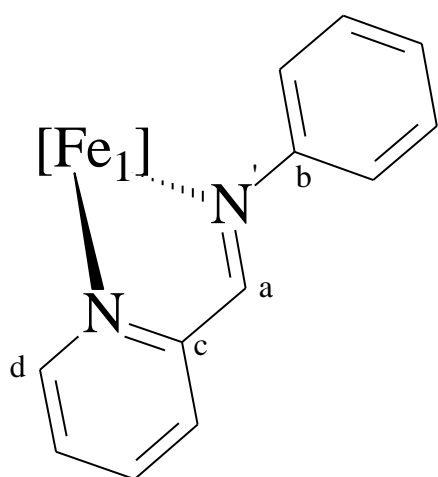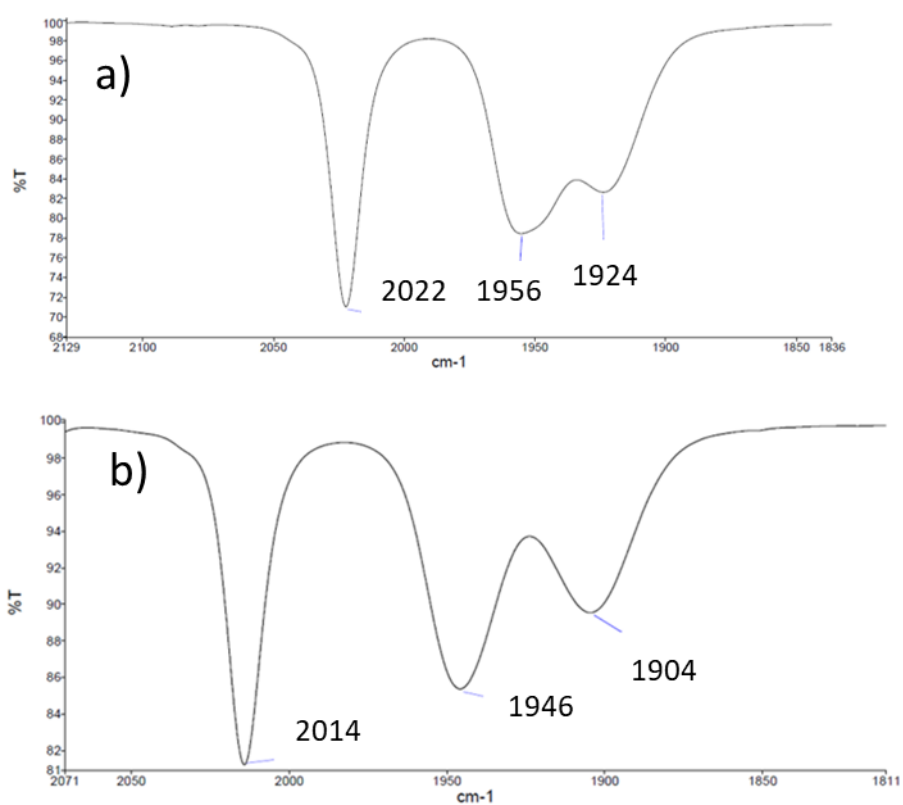

**Figure S1.** IR (CH<sub>2</sub>Cl<sub>2</sub>) spectra of **1** (a) and **2** (b) in carbonyl region



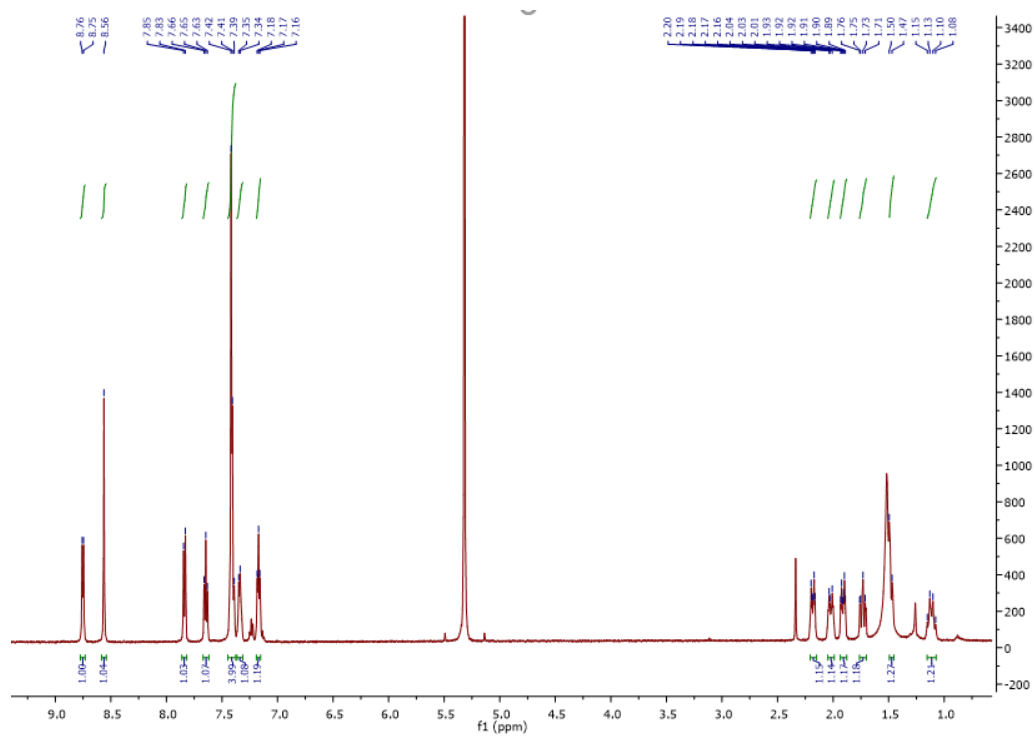

(a)

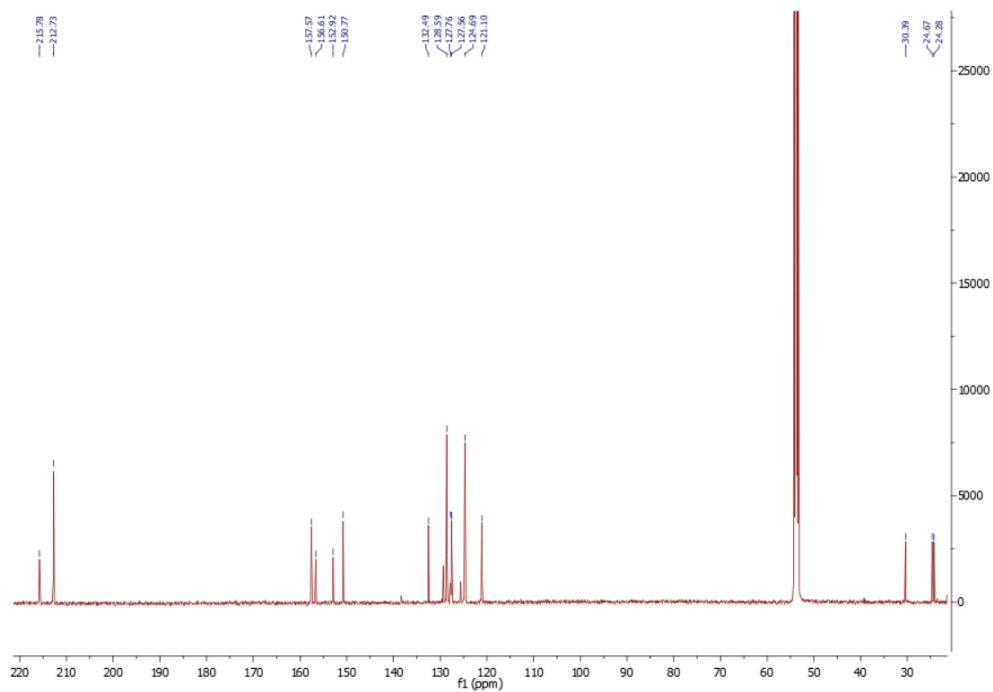

(b)

**Figure S3.** <sup>1</sup>H NMR (a) and <sup>13</sup>C{<sup>1</sup>H} (b) NMR spectra of **2** in CD<sub>2</sub>Cl<sub>2</sub> at 298 K

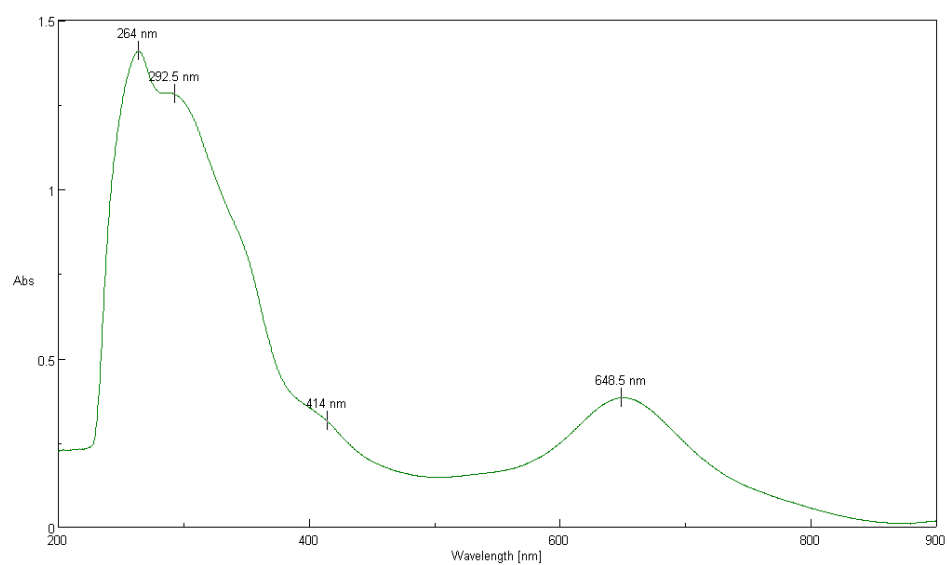

(a)

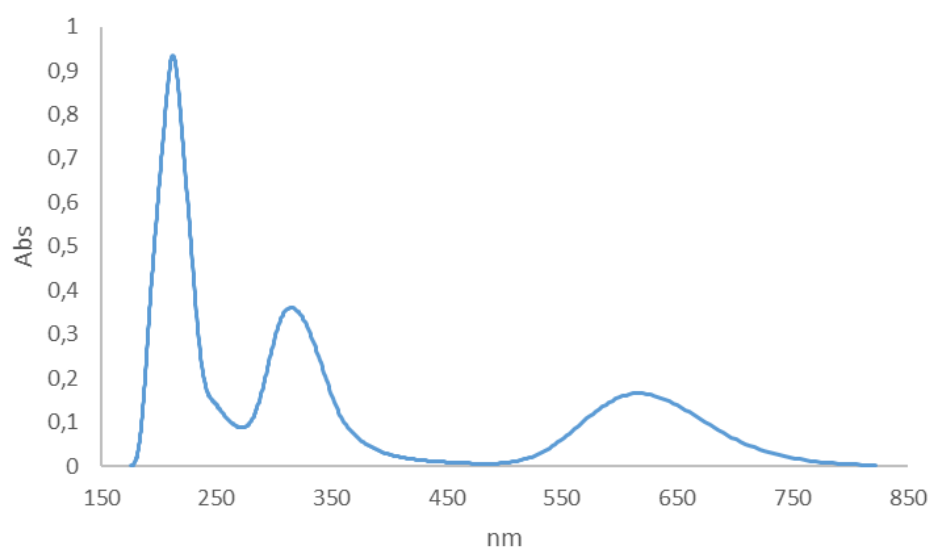

(b)

**Figure S4.** Experimental UV-Visible spectrum of **1** in  $\text{CH}_2\text{Cl}_2$  (a); theoretical UV-Visible spectrum of **1** (b)

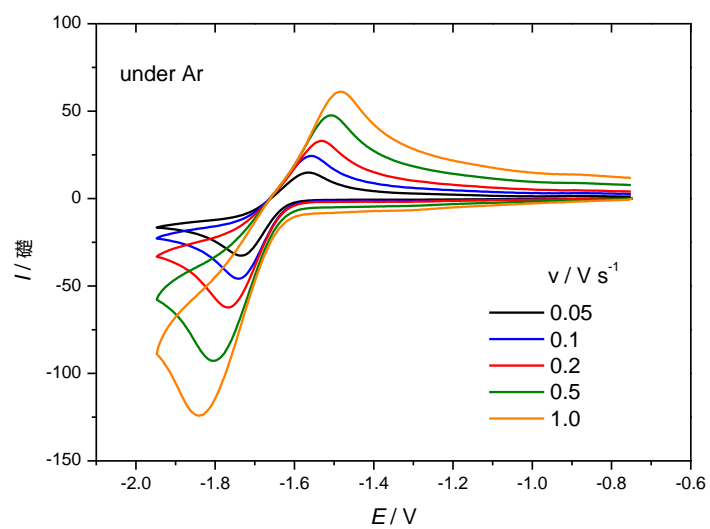

**Figure S5.** Scan rate depending of the reduction peak of **1** in  $\text{CH}_2\text{Cl}_2$ -[NBu<sub>4</sub>][PF<sub>6</sub>] (0.2 M) under Ar

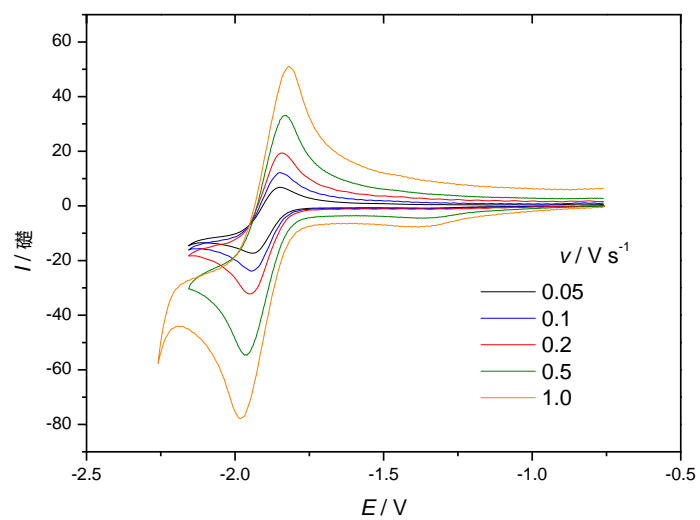

**Figure S6.** Scan rate depending of the reduction peak of **2** in  $\text{CH}_2\text{Cl}_2$ -[NBu<sub>4</sub>][PF<sub>6</sub>] (0.2 M) under Ar



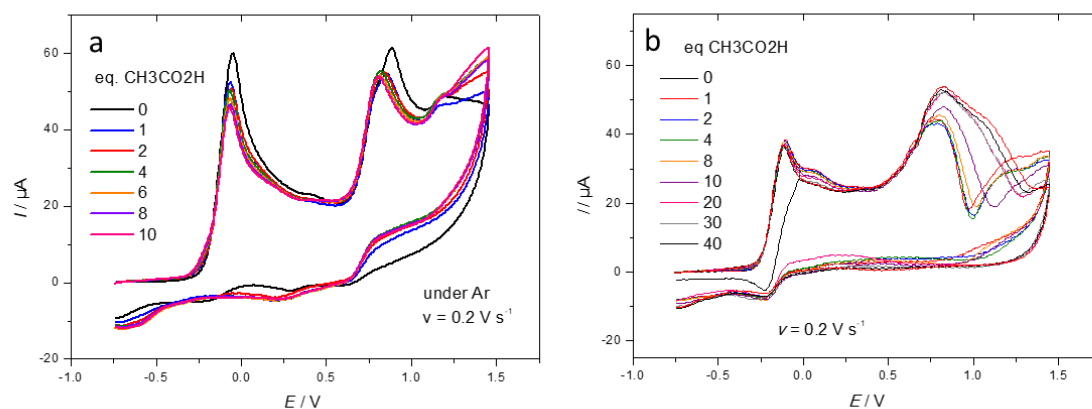

**Figure S7.** Oxidation of **1** (1.26 mM) (a) and **2** (1.44 mM) (b) in the presence of  $\text{CH}_3\text{CO}_2\text{H}$  in  $\text{CH}_2\text{Cl}_2$ - $[\text{NBu}_4][\text{PF}_6]$  (0.2 M) under Ar at  $0.2 \text{ V s}^{-1}$ .

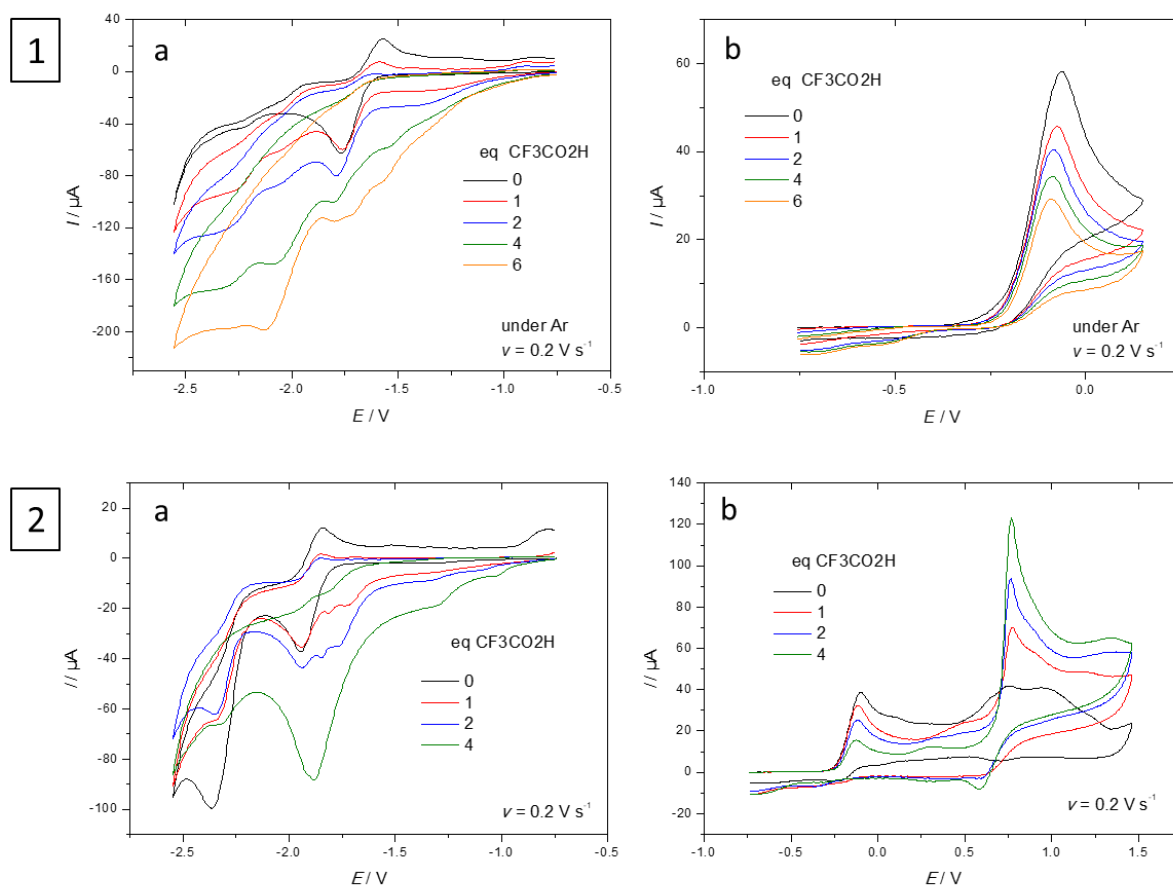

**Figure S8.** CV, reduction (a) and oxidation (b), of **1** (1.39 mM) and **2** (1.46 mM) in the presence of  $\text{CF}_3\text{CO}_2\text{H}$  in  $\text{CH}_2\text{Cl}_2$ - $[\text{NBu}_4][\text{PF}_6]$  (0.2 M) under Ar at  $0.2 \text{ V s}^{-1}$ .

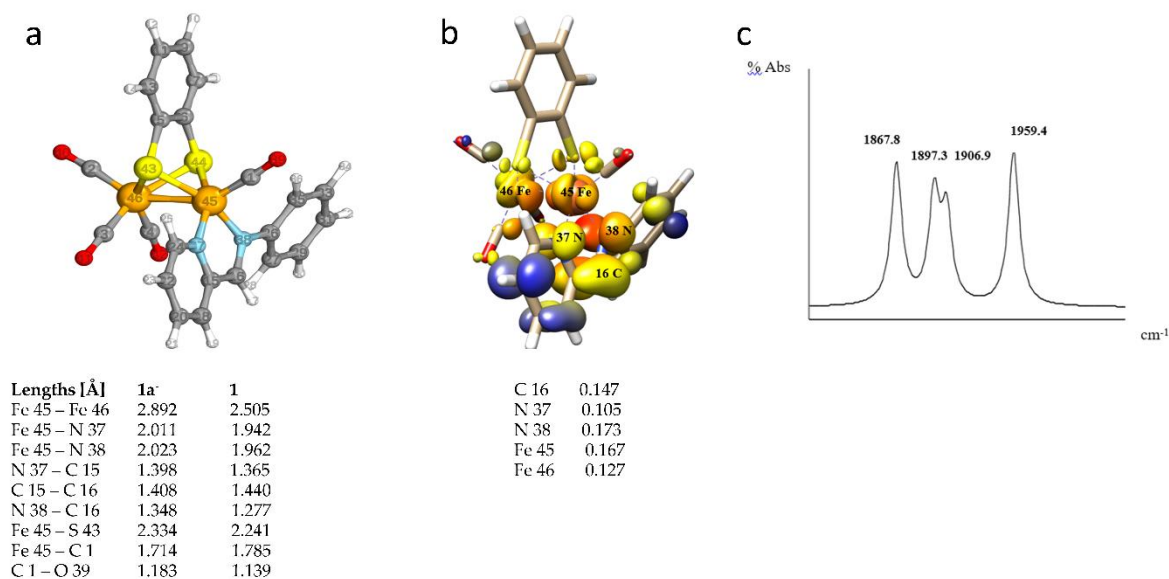

**Figure S9.** (a) Optimized structure of **1a<sup>-</sup>** with details on selected geometrical parameters and their comparison with **1**. (b) Spin density plot of **1a<sup>-</sup>** with related single contribution values to the total spin density for the more relevant atoms (spin density  $\geq 0.1$ ). (c) Calculated IR  $\nu$ CO bands of **1a<sup>-</sup>**.

The DFT IR spectrum of **1<sup>-</sup>** in CH<sub>2</sub>Cl<sub>2</sub> shows four  $\nu$ (CO) bands at 1959.4, 1906.9, 1897.3 and 1867.8 cm<sup>-1</sup>. The average value is 1907.9 cm<sup>-1</sup> and there is a red shift of 59.1 cm<sup>-1</sup> compared to the average wavenumbers determined for the neutral complex (1967 cm<sup>-1</sup>). This observation is consistent with an enhancement of the electron density at the di-iron core: the higher the electron density at metal, the stronger the  $\pi$ -back donation from metal to CO, which implies stronger Fe-C(O) bond and weaker (Fe)C-O. The red shift of the IR CO bands lends further support to some degree of electronic communication between the chelate and the dimetallic core. Indeed, if all the additional electron density (from reduction) was on pma it could not contribute to a typical signature involving some level of metal reduction.

Details about high-energy isomers of **1<sup>-</sup>**: **1f<sup>-</sup>** and **1g<sup>-</sup>** arise from the hypothetical formation of a bridging CO, initially bonded to the unsubstituted iron centre {Fe(CO)<sub>3</sub>}. In this scenario, it is not necessary to figure out any metal rotation since there are two carbonyls available in basal position. As mentioned before, such a new bond should be formed to fill the coordination sphere of the metal involved once one metal-sulfur bond is broken, leading (again) to two regiochemical possibilities. Both can be also excluded since they are even less stable than other configurations, probably because the [Fe(CO)<sub>3</sub>] moiety is less electron rich than the [Fe(CO)pma] one. **1b<sup>-</sup>** and **1e<sup>-</sup>** feature a partial rotation of the pma ligand and they can be seen as the intermediates of **1c<sup>-</sup>** and **1d<sup>-</sup>** since a rotation is required to get the CO in basal position.

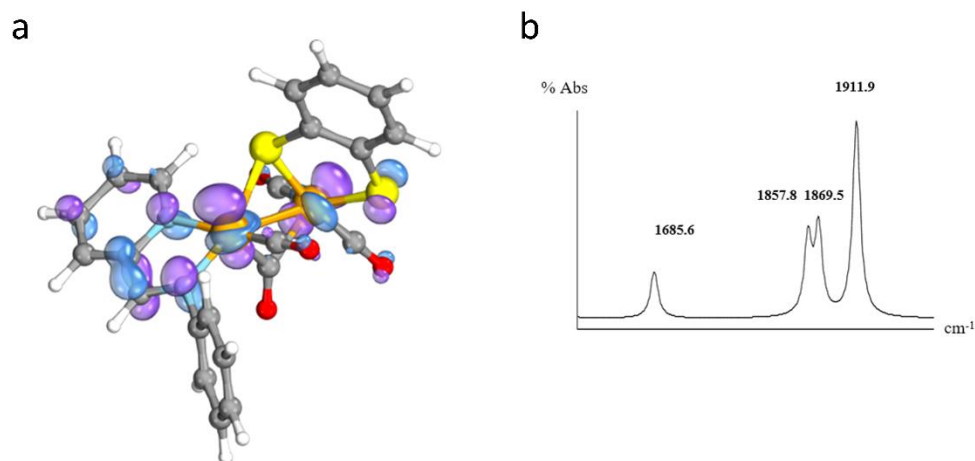

**Figure S10.** (a) HOMO of  $1a^{2-}$  (isosurface cutoff 0.05 a.u.), showing a mixed metal-ligand character. (b) Calculated IR  $\nu_{CO}$  bands of  $1a^{2-}$ .

The HOMO of  $1a^{2-}$  could be described as an overall  $\sigma^*$  Fe<sub>2</sub>S<sub>2</sub> orbital (two different iron d orbitals ( $d_{z^2}$  and  $d_{xy}$ ) with a  $\sigma^*(FeS)$  contribution) mixed with a  $\pi^*$  pma ligand orbital. The theoretical IR spectrum of the dianion shows four  $\nu(CO)$  bands at 1911.9, 1869.5, 1857.8 and 1685.6 cm<sup>-1</sup>. The band at 1685.6 cm<sup>-1</sup> is assigned to the asymmetrical stretching of the bridging CO. The average value is 1831.2 cm<sup>-1</sup> and there is a shift at lower wavenumbers of 76.7 cm<sup>-1</sup> compared to the average (CO) values of the mono-anion  $1a^-$ . This shift suggests an efficient  $\pi$  back donation from the metals to CO, likely due to the enhancement of the electron density at the di-iron core.

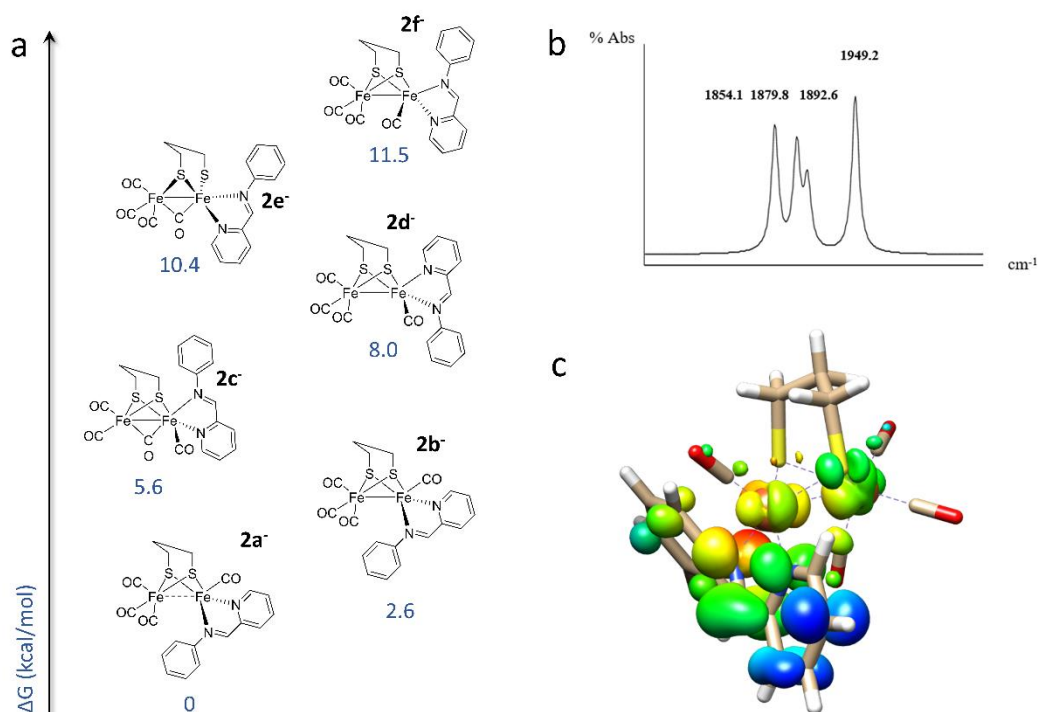

**Figure S11.** (a) Thermodynamic speciation of  $2^-$ . (The anionic nature of all structure reported is implicit, thus omitted for clarity). (b) Theoretical IR spectrum in the  $\nu_{CO}$  region (in  $CH_2Cl_2$ ) of  $2a^-$ . (c) Spin density plot in  $2a^-$ .

**2f** and **2d** are obtained by a 120° rotation of pma; one CO moved from an apical to a basal position through a fast exchange. **2f** is characterized by the presence of the imine in apical position while in **1d** there is the pyridine moiety. **2d** is slightly less unstable than **2a**, probably due to the steric clash of the phenyl ring and the -S(CH<sub>2</sub>)<sub>3</sub>-S in the latter. **2e** represents a possible further evolution of the **2f** isomer, involving the formation of a bridging CO bond concomitantly with the breaking of one Fe-S bond. Due to the complex asymmetry, there are two different possibilities leading to two different regioisomers as seen previously for **1**.

The DFT IR spectrum of **2a** is expectedly similar to that of **1a**: four bands at 1949.2, 1892.6, 1879.8 and 1854.1 cm<sup>-1</sup>. The average value is 1893.9 cm<sup>-1</sup> and there is, as expected, a shift of ~ 60 cm<sup>-1</sup> at lower wavenumbers compared to the average frequency of **2**, consistent with an enhancement of the electron density at the di-iron core.

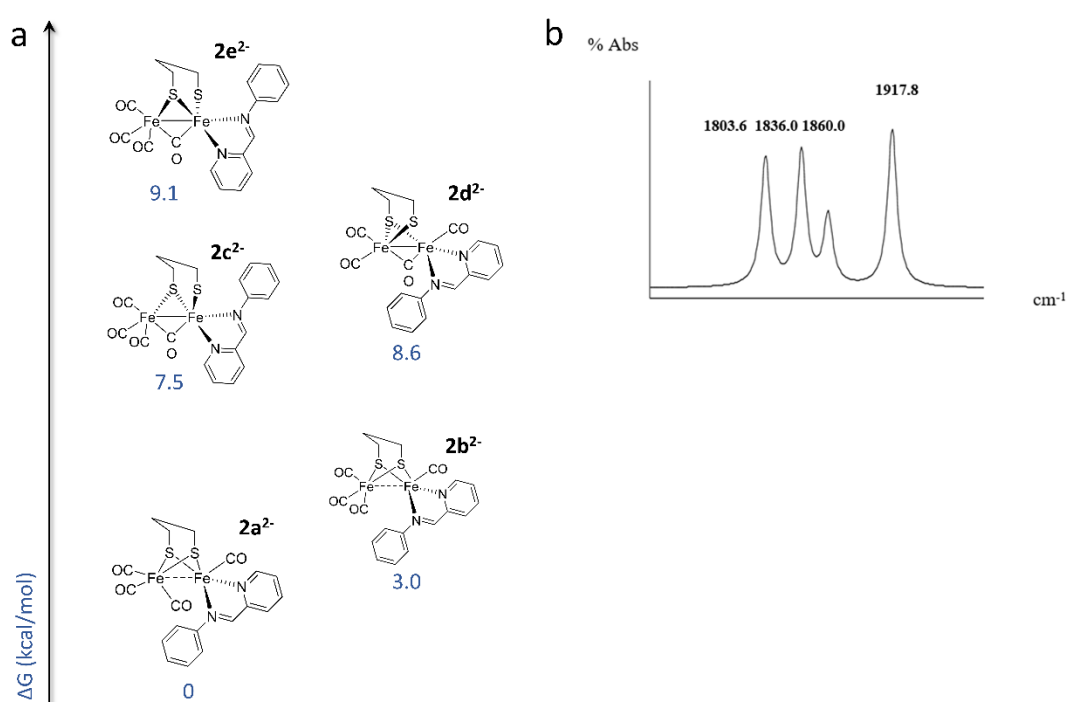

**Figure S12.** (a) Thermodynamic speciation of **2**<sup>2-</sup>. (The anionic nature of all structure reported is implicit, thus omitted for clarity). (b) Theoretical IR spectrum in the  $\nu_{CO}$  region (in CH<sub>2</sub>Cl<sub>2</sub>) of **2a**<sup>2-</sup>.

The DFT IR spectrum of **2a**<sup>2-</sup> shows four bands at 1917.8, 1860.0, 1836.0 and 1803.6 cm<sup>-1</sup>. The average value is 1854.4 cm<sup>-1</sup>, corresponding to an expected shift (40 cm<sup>-1</sup>) to lower wavenumbers compared to the average frequency determined for the mono-anion complex **2**.

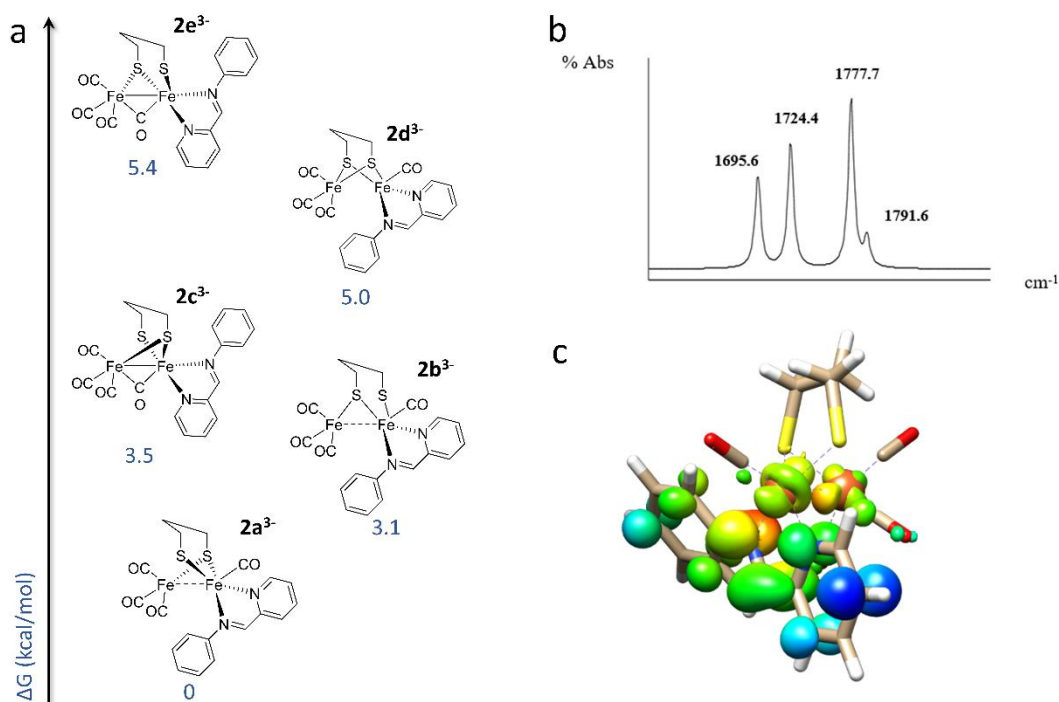

**Figure S13.** (a) Thermodynamic speciation of  $2^{3-}$ . (The anionic nature of all structure reported is implicit, thus omitted for clarity). (b) Theoretical IR spectrum in the  $\nu\text{CO}$  region (in  $\text{CH}_2\text{Cl}_2$ ) of  $2a^{3-}$ . (c) Spin density plot of  $2a^{3-}$ .

The DFT IR spectrum of  $2a^{3-}$  displays four bands attributed to CO at 1791.6, 1777.7, 1724.4 and 1695.6  $\text{cm}^{-1}$ . As expected in connection with the addition of a negative charge on the species, their average value of 1747.3  $\text{cm}^{-1}$  is shifted at lower wavenumber by 107.1  $\text{cm}^{-1}$  compared to the average wavenumber calculated for  $2a^2$ . (c) Spin density plot of  $2a^{3-}$ .

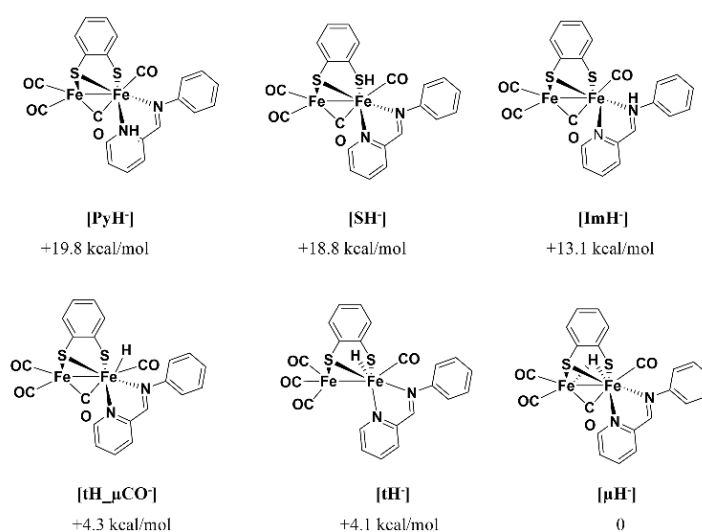

**Figure S14.** Thermodynamic speciation of  $1H^-$ . (The anionic nature of all structure reported is implicit, thus omitted for clarity).

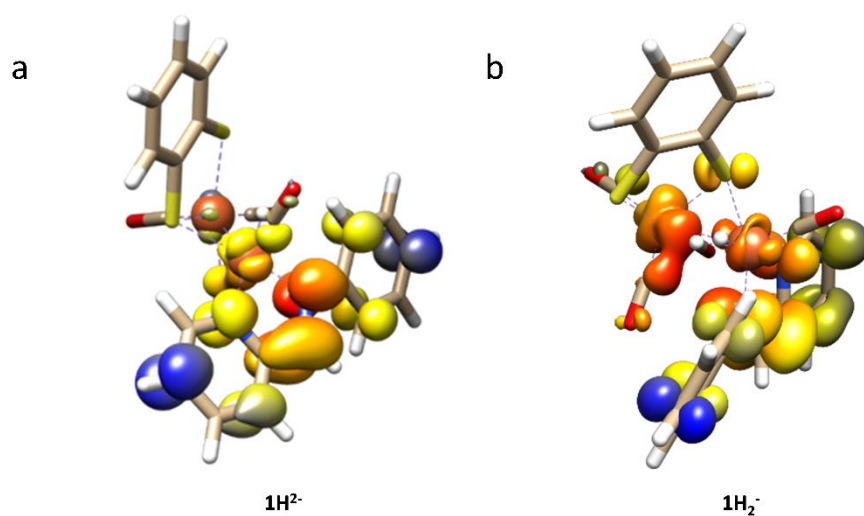

**Figure S15.** Spin density plot of  $1\text{H}_2^-$  (a) and  $1\text{H}_2^-$  (b).

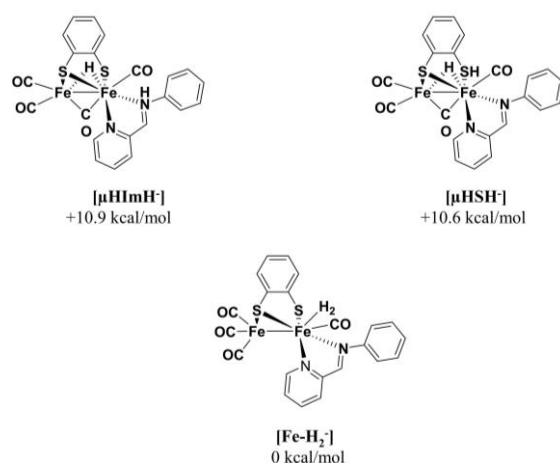

**Figure S16.** Thermodynamic speciation of  $1\text{H}_2^-$ . Protonation of pma at the pyridine moiety does not lead to an energy minimum, since the proton is spontaneously transferred from the ligand to the diiron core (forming  $[\text{Fe-H}_2^-]$ ) upon geometry optimization. (The anionic nature of all structure reported is implicit, thus omitted for clarity).
